# Supplementary material
Source: PubMed Central journal article supplement (PMC6328769)
Supplement: AEM.01997-18-s0001.pdf [file AEM.01997-18-s0001.pdf]

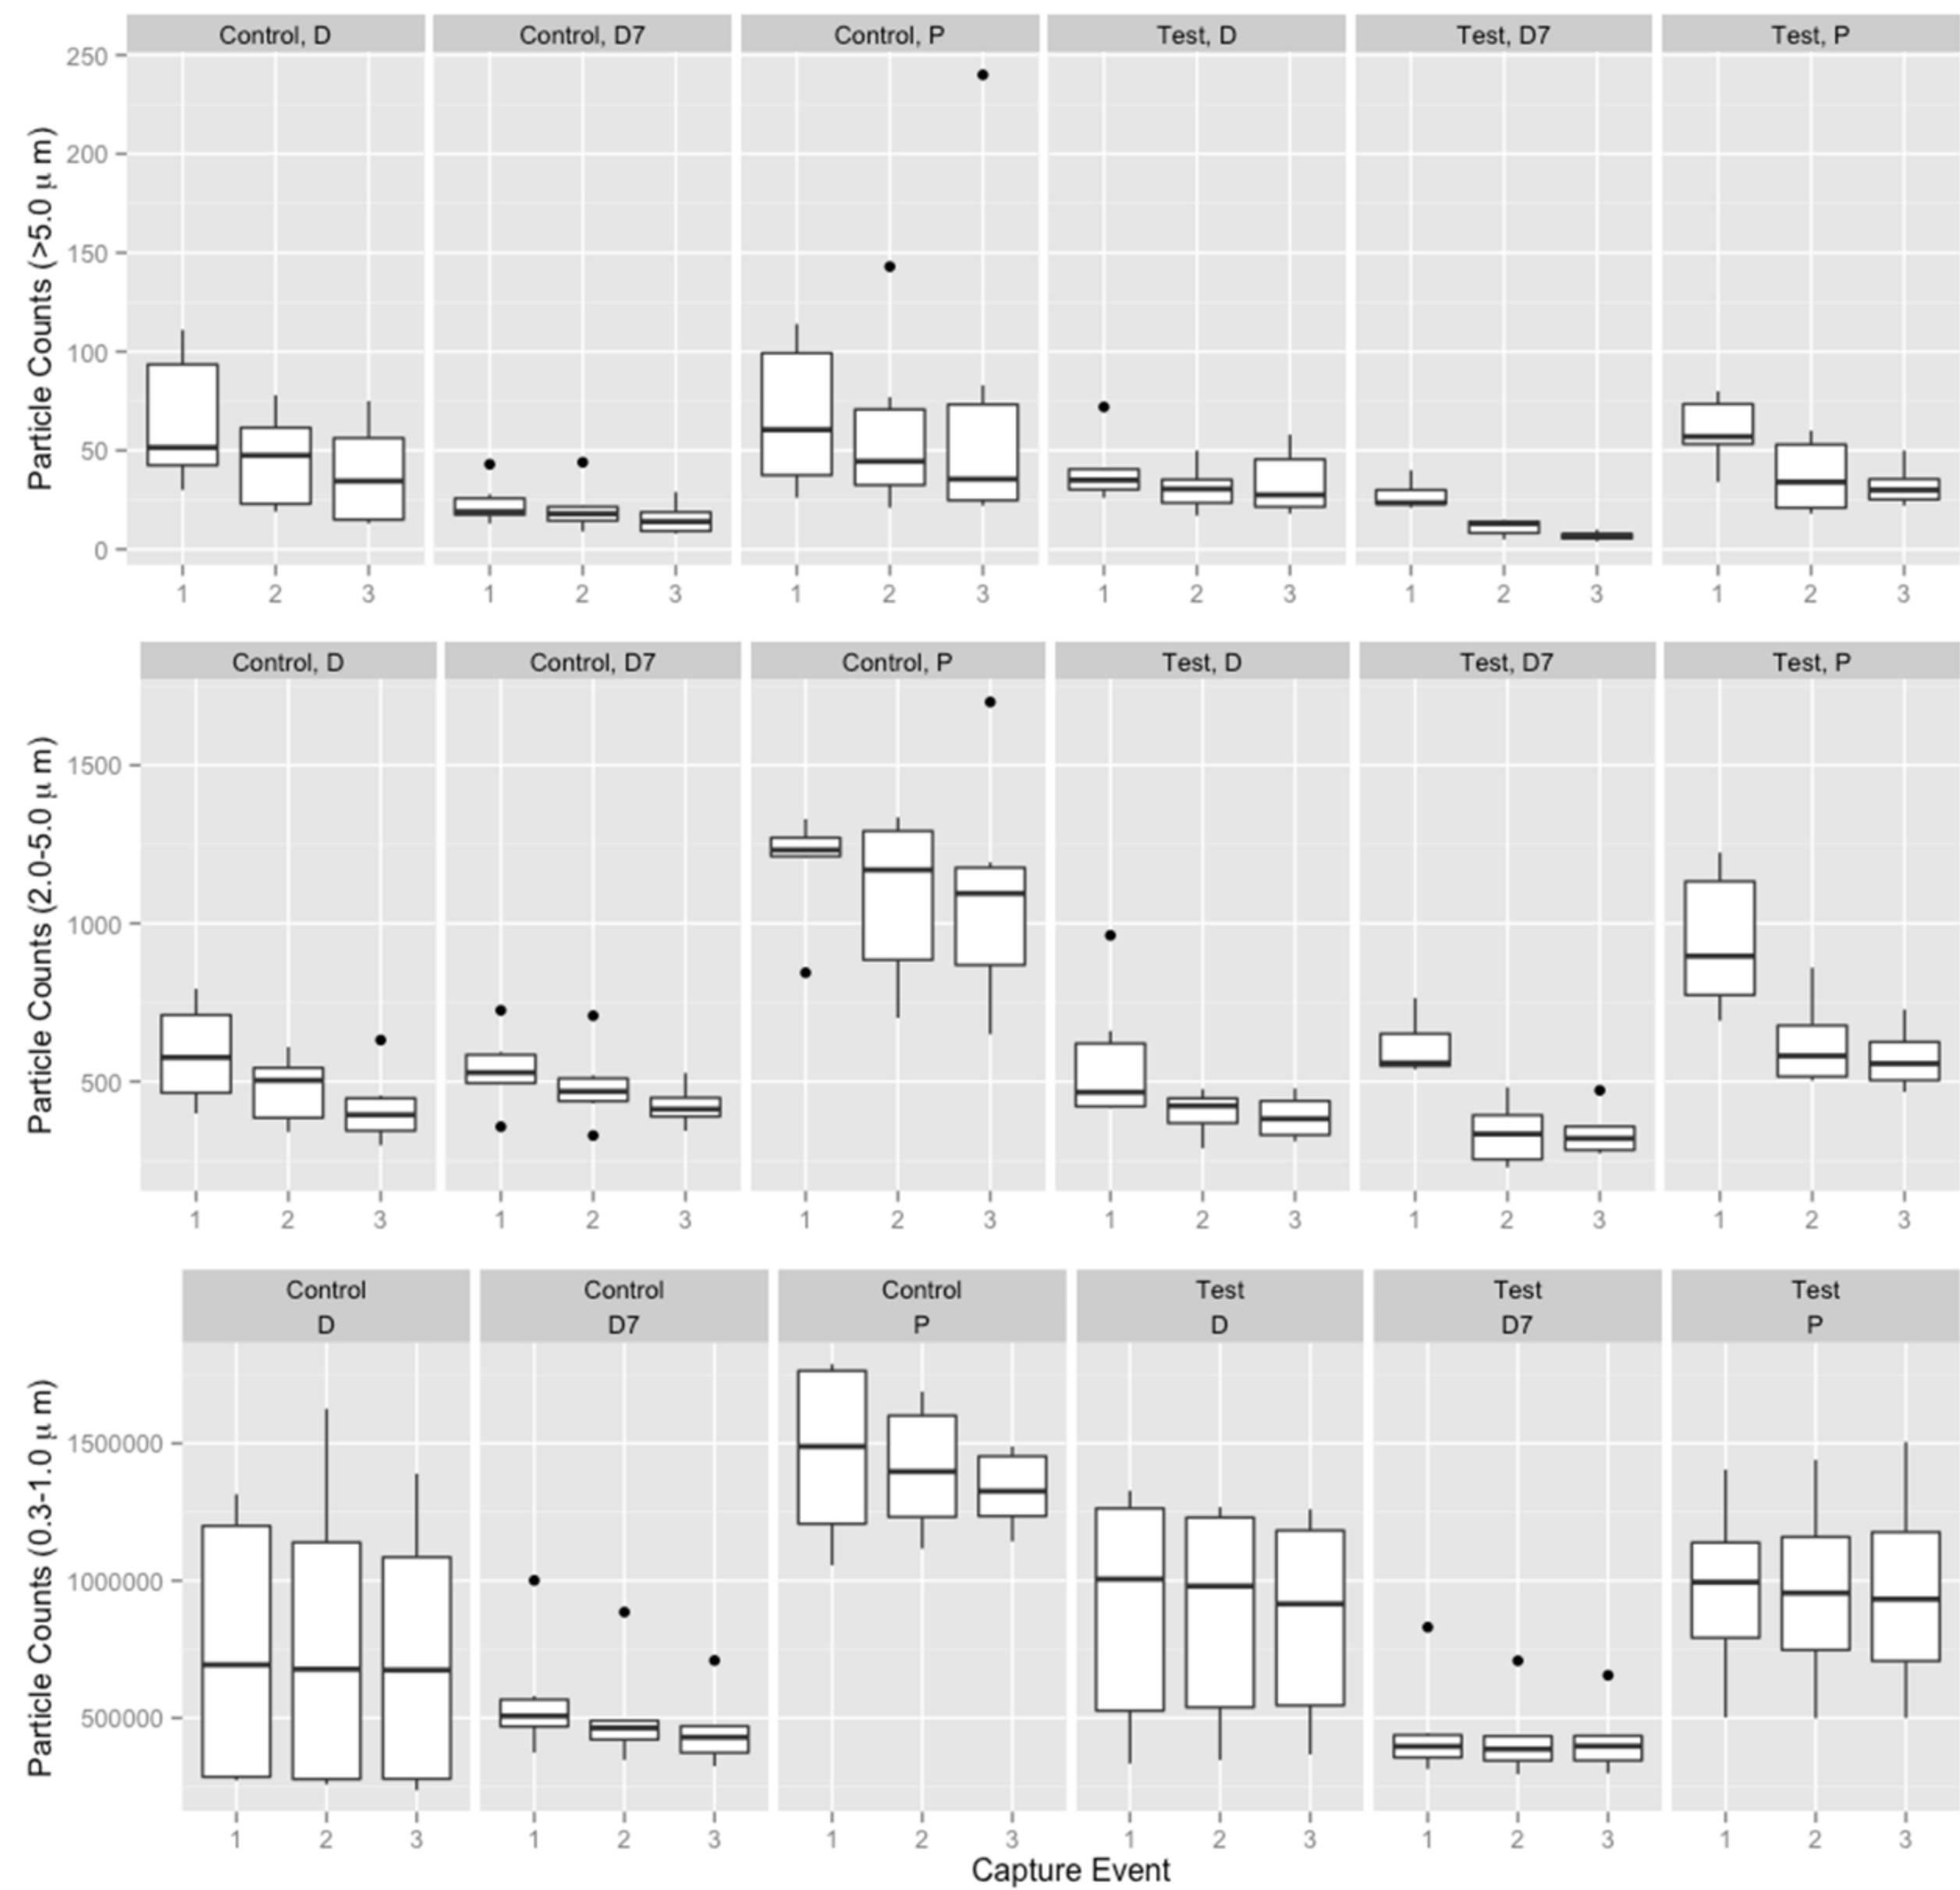

**Supplemental Figure S1:** Particle Counts (measured with MetOne GT-526) across Control (without faucet) and Test (with faucet) experiments of D-Drain inoculation, D7-Drainline colonization and P-P-trap inoculation methods.
